# Supplementary material
Source: PubMed Central journal article supplement (PMC6142959)
Supplement: jamasurg-153-e181607-s001.pdf [file jamasurg-153-e181607-s001.pdf]

## Supplementary Online Content

Kitz J, Fokas E, Beissbarth T, et al; German Rectal Cancer Study Group. Association of plane of total mesorectal excision with prognosis of rectal cancer: secondary analysis of the CAO/ARO/AIO-04 phase 3 randomized clinical trial *JAMA Surg*. Published online June 6, 2018. doi:10.1001/jamasurg.2018.1607

### **eMethods.**

**eFigure 1.** Treatment schedule of the CAO/ARO/AIO-04 randomized phase 3 trial.

**eFigure 2.** Total mesorectal excision (TME) quality in surgical specimens. Examples of (a) mesorectal plane (TME quality: “good”) with complete and smooth surface and without coning; (b) intramesorectal plane (TME quality “moderate”) with moderately irregular surface; (c) muscularis propria plane (TME quality “poor”) with severely irregular surface.

**eTable 1.** Association of the pathologist-based quality of TME with pretreatment patient and tumor factors in operated patients receiving preoperative 5-FU based chemoradiotherapy with or without oxaliplatin

**eTable 2.** Correlation of pathologist-based with surgeon-based TME quality

**eTable 3.** Impact of pre-treatment clinical and pathologic factors on 3-year outcomes after preoperative 5-FU chemoradiotherapy +/- Oxaliplatin and surgery

**eTable 4.** Multivariate analysis of different covariables on 3-year outcomes after preoperative 5-FU chemoradiotherapy +/- oxaliplatin and surgery

This supplementary material has been provided by the authors to give readers additional information about their work.

## **eMETHODS**

### **Study design and participants**

Patients with rectal adenocarcinoma up to 12 cm above the anal verge with cT3-4 and/or lymph node-positive disease were randomly assigned to receive either standard 5-FU-based CRT (control arm) or oxaliplatin plus 5-FU-based preoperative CRT (investigational arm). Postoperative chemotherapy was administered in both study arms. Surgery was performed 5-6 weeks after completion of CRT using TME, and postoperative chemotherapy was initiated 4 weeks after surgery. Randomization was performed using computer-generated block-randomization codes stratified by center, clinical T category (cT1–4 vs cT4), and clinical N category (cN0 vs cN1–2) without masking. DFS was the primary endpoint. We hypothesized that addition of oxaliplatin would improve the primary endpoint DFS improve from 75% in the control arm to 82% in the investigational arm at 3-years (hazard ratio of 0.81). The sample size required in this trial was 1200 patients using a power of 80% and a type I error of 5%. Secondary endpoints included the plane (quality) of TME surgery, pathological complete response, resection status, the proportion of patients having R0 resection, the number of patients having sphincter-sparing surgery, overall survival, local and distant recurrence, acute and late toxicity.

Safety and compliance analyses included patients as treated, efficacy endpoints were examined using the intention-to-treat principle. The trial registration number was number NCT00349076 (ClinicalTrials.gov).

### **Follow-up**

Follow-up examinations were performed at 3-month intervals during the first 2 years after surgical operation, and then annually up to 5 years. Follow-up included patient history, physical examination, ultrasound of the abdomen, and serum carcinoembryonic antigen. Computed tomography of the abdomen and pelvis was repeated 3 months after treatment completion. Colonoscopy was conducted at 6 months if previously omitted, otherwise at 1 year and 5 years. Chest radiography was performed on an annual basis up to a total of 5 years post-treatment. Histological confirmation was advocated in case of suspicious clinical and radiological findings indicating locoregional and/or distant recurrence.

eFigure 1. Treatment schedule of the CAO/ARO/AIO-04 randomized phase 3 trial.

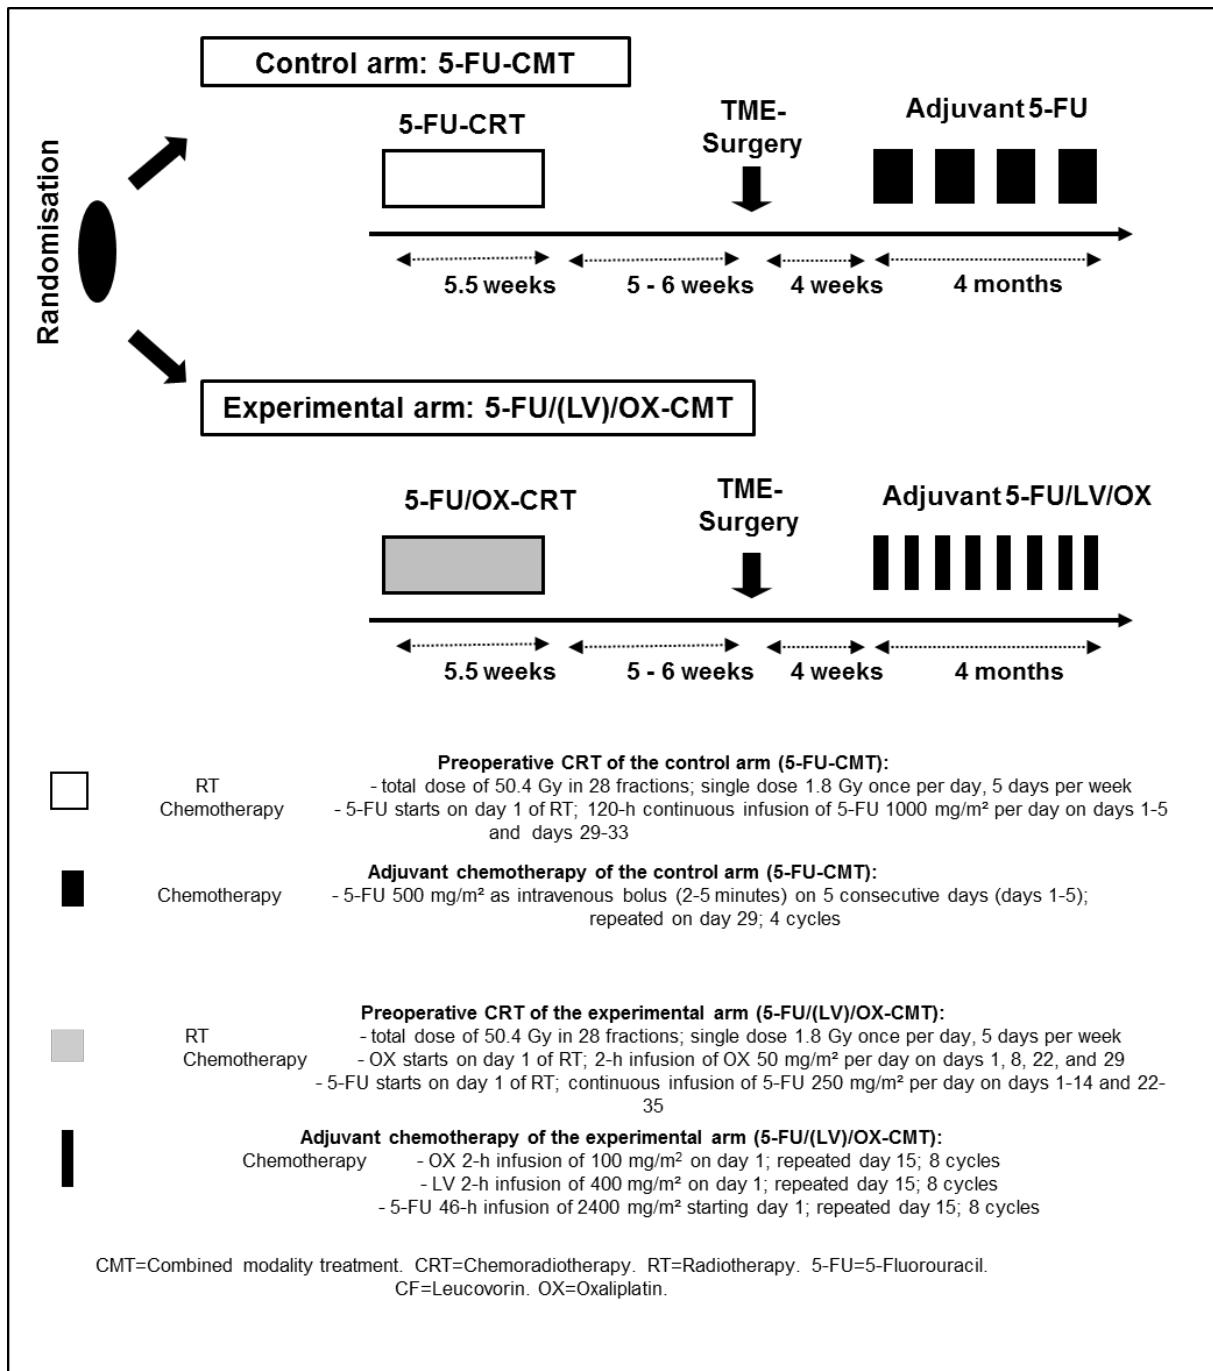

**eFigure 2. Total mesorectal excision (TME) quality in surgical specimens.** Examples of **(a)** mesorectal plane (TME quality: “good”) with complete and smooth surface and without coning; **(b)** intramesorectal plane (TME quality “moderate”) with moderately irregular surface; **(c)** muscularis propria plane (TME quality “poor”) with severely irregular surface.

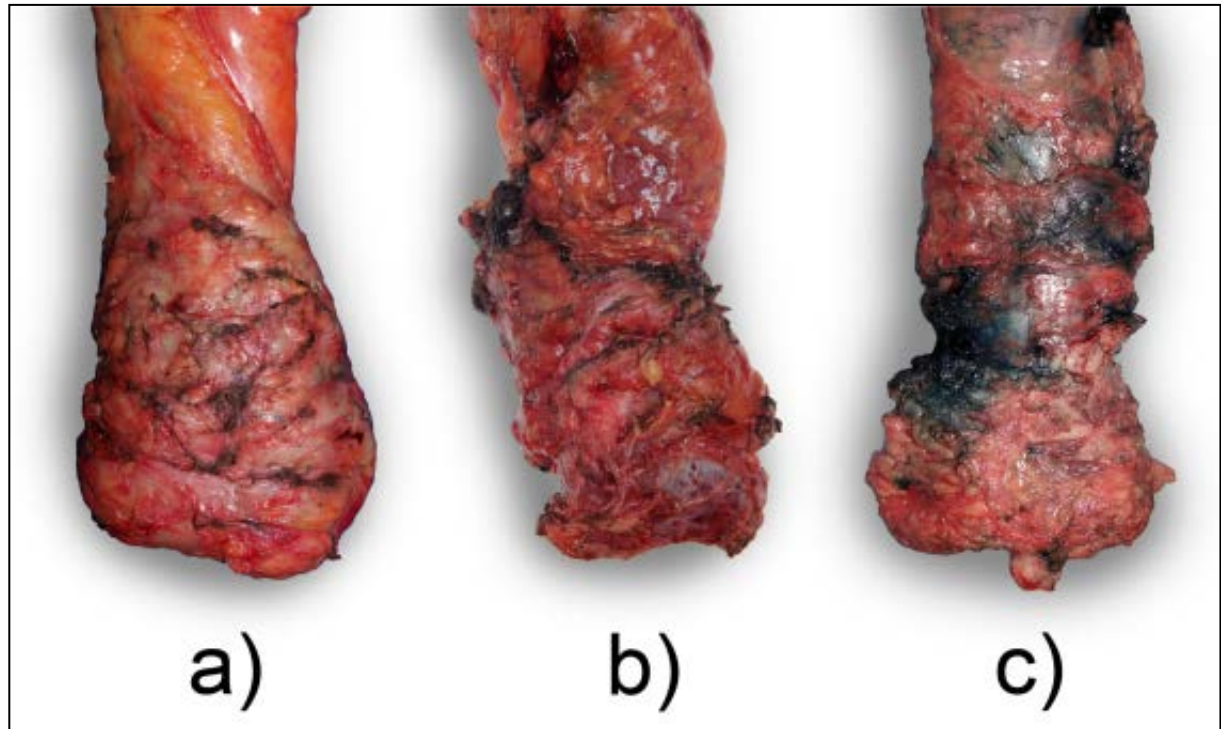

**eTable 1. Association of the pathologist-based quality of TME with pretreatment patient and tumor factors in operated patients receiving preoperative 5-FU based chemoradiotherapy with or without oxaliplatin**

|                          | Total<br>N (%) | Mesorectal<br>N (%) | Intramesorecta<br>I<br>N (%) | muscularis<br>propria<br>N (%) | P-<br>value      |
|--------------------------|----------------|---------------------|------------------------------|--------------------------------|------------------|
|                          | 1152 (100%)    | 930 (80.7%)         | 169 (14.7%)                  | 53 (4.6%)                      |                  |
| Study Arm (randomized)   |                |                     |                              |                                |                  |
| 5-FU                     | 588 (51.0%)    | 475 (80.8%)         | 84 (14.3%)                   | 29 (4.9%)                      | 0.820            |
| 5-FU + Oxaliplatin       | 564 (49.0%)    | 455 (80.7%)         | 85 (15.1%)                   | 24 (4.3%)                      |                  |
| Age - Mean (SD)          |                |                     |                              |                                |                  |
| <= median 63.5 years     | 62.2 (±10.0)   | 61.9 (±10.0)        | 63.6 (±9.5)                  | 62.3 (±10.5)                   | 0.450            |
| > median 63.5 years      | 578 (50.2%)    | 475 (82.2%)         | 78 (13.5%)                   | 25 (4.3%)                      |                  |
|                          | 574 (49.8%)    | 455 (79.3%)         | 91 (15.9%)                   | 28 (4.9%)                      |                  |
| Gender                   |                |                     |                              |                                |                  |
| male                     | 820 (71.2%)    | 673 (82.1%)         | 115 (14.0%)                  | 32 (3.9%)                      | 0.110            |
| female                   | 332 (28.8%)    | 257 (77.4%)         | 54 (16.3%)                   | 21 (6.3%)                      |                  |
| ECOG-PS                  |                |                     |                              |                                |                  |
| Grade 0                  | 901 (78.2%)    | 738 (81.9%)         | 125 (13.9%)                  | 38 (4.2%)                      | 0.120            |
| Grade 1+2                | 239 (20.7%)    | 182 (76.2%)         | 42 (17.6%)                   | 15 (6.3%)                      |                  |
| Missing                  | 12 (1.0%)      | 10 (83.3%)          | 2 (16.7%)                    | 0 (0.0%)                       |                  |
| BMI - Mean (SD)          |                |                     |                              |                                |                  |
| (14-25)                  | 27.0 (±4.4)    | 27.0 (±4.4)         | 26.9 (±4.6)                  | 26.4 (±4.5)                    | 0.630            |
| (25-30)                  | 390 (33.9%)    | 308 (79.0%)         | 60 (15.4%)                   | 22 (5.6%)                      |                  |
| (30-49)                  | 508 (44.1%)    | 419 (82.5%)         | 70 (13.8%)                   | 19 (3.7%)                      |                  |
| Missing                  | 250 (21.7%)    | 200 (80.0%)         | 38 (15.2%)                   | 12 (4.8%)                      |                  |
|                          | 4 (0.3%)       | 3 (75.0%)           | 1 (25.0%)                    | 0 (0.0%)                       |                  |
| clinical T               |                |                     |                              |                                |                  |
| cT2                      | 47 (4.1%)      | 37 (78.7%)          | 10 (21.3%)                   | 0 (0.0%)                       | <b>&lt;0.001</b> |
| cT3                      | 1022 (88.7%)   | 837 (81.9%)         | 144 (14.1%)                  | 41 (4.0%)                      |                  |
| cT4                      | 78 (6.8%)      | 54 (69.2%)          | 13 (16.7%)                   | 11 (14.1%)                     |                  |
| Missing                  | 5 (0.4%)       | 2 (40.0%)           | 2 (40.0%)                    | 1 (20.0%)                      |                  |
| clinical N               |                |                     |                              |                                |                  |
| cN0                      | 288 (25.0%)    | 247 (85.8%)         | 30 (10.4%)                   | 11 (3.8%)                      | <b>0.041</b>     |
| cN1-2                    | 837 (72.7%)    | 662 (79.1%)         | 135 (16.1%)                  | 40 (4.8%)                      |                  |
| Missing                  | 27 (2.3%)      | 21 (77.8%)          | 4 (14.8%)                    | 2 (7.4%)                       |                  |
| Distance from anal verge |                |                     |                              |                                |                  |
| 0-5                      | 376 (32.6%)    | 273 (72.6%)         | 75 (19.9%)                   | 28 (7.4%)                      | <b>&lt;0.001</b> |
| 5-10                     | 564 (49.0%)    | 480 (85.1%)         | 65 (11.5%)                   | 19 (3.4%)                      |                  |
| >10                      | 107 (9.3%)     | 92 (86.0%)          | 12 (11.2%)                   | 3 (2.8%)                       |                  |
| Missing                  | 105 (9.1%)     | 85 (81.0%)          | 17 (16.2%)                   | 3 (2.9%)                       |                  |

## Grading

|         |             |             |             |           |       |
|---------|-------------|-------------|-------------|-----------|-------|
| G1      | 62 (5.4%)   | 49 (79.0%)  | 12 (19.4%)  | 1 (1.6%)  | 0.530 |
| G2      | 926 (80.4%) | 752 (81.2%) | 129 (13.9%) | 45 (4.9%) |       |
| G3      | 92 (8.0%)   | 72 (78.3%)  | 16 (17.4%)  | 4 (4.3%)  |       |
| Missing | 72 (6.2%)   | 57 (79.2%)  | 12 (16.7%)  | 3 (4.2%)  |       |

---

Abbreviations: 5FU, 5-fluorouracil; CRT, chemoradiotherapy; Ox, oxaliplatin; TME, total mesorectal excision; PS, performance status; Significant p-values are marked in bold.

**eTable 2. Correlation of pathologist-based with surgeon-based TME quality**

|                              |                    | Pathologist-based TME quality |                 |                    |                 | N   |
|------------------------------|--------------------|-------------------------------|-----------------|--------------------|-----------------|-----|
|                              |                    | Mesorectal                    | Intermesorectal | Muscularis propria | Unknown/missing |     |
| Surgeon-based<br>TME quality | Mesorectal         | 827<br>(86.4%)                | 83 (8.7%)       | 12 (1.3%)          | 35 (3.7%)       | 957 |
|                              | Intermesorectal    | 27 (22.3%)                    | 68 (56.2%)      | 22 (18.2%)         | 4 (3.3%)        | 121 |
|                              | Muscularis Propria | 2 (10%)                       | 3 (15.0%)       | 15 (75.0%)         | 0 (0%)          | 20  |
|                              | Unknown/missing    | 74 (65.6%)                    | 15 (13.3%)      | 4 (3.5%)           | 20 (17.7%)      | 113 |
|                              | N                  | 930                           | 169             | 53                 | 59              |     |

**eTable 3. Impact of pre-treatment clinical and pathologic factors on 3-year outcomes after preoperative 5-FU chemoradiotherapy +/- Oxaliplatin and surgery**

|              | N   | 3-year DFS % (95% CI) | P-Value          | 3-year cumulative incidence of distant metastases % (95% CI) | P-Value          | 3-year cumulative incidence of local recurrences after local R0/R1 resection % (95% CI) | P-Value      | 3-year OS % (95% CI) | P-Value          |
|--------------|-----|-----------------------|------------------|--------------------------------------------------------------|------------------|-----------------------------------------------------------------------------------------|--------------|----------------------|------------------|
| Study Arm    |     |                       |                  |                                                              |                  |                                                                                         |              |                      |                  |
| 5-FU-CRT     | 623 | 71.2 [67.6-74.9]      | <b>0.032</b>     | 23.1 [19.6-26.5]                                             | <b>0.041</b>     | 4.9 [3.1-6.7]                                                                           | <b>0.011</b> | 88.0 [85.4-90.7]     | 0.763            |
| 5-FU/Ox-CRT  | 613 | 75.9 [72.5-79.6]      |                  | 19.2 [15.8-22.5]                                             |                  | 3.2 [1.7-4.7]                                                                           |              | 88.7 [86.1-91.4]     |                  |
| Age (median) |     |                       |                  |                                                              |                  |                                                                                         |              |                      |                  |
| Age ≤63.6    | 623 | 74.4 [70.9-78.1]      | 0.958            | 19.0 [15.6-22.2]                                             | 0.139            | 3.6 [2.0-5.2]                                                                           | 0.585        | 86.1 [83.3-89.0]     | <b>0.014</b>     |
| Age >63.6    | 613 | 72.6 [69.1-76.3]      |                  | 23.3 [19.8-26.7]                                             |                  | 4.5 [2.8-6.2]                                                                           |              | 90.5 [88.1-93.0]     |                  |
| Gender       |     |                       |                  |                                                              |                  |                                                                                         |              |                      |                  |
| male         | 874 | 73.0 [70.0-76.1]      | 0.358            | 21.8 [18.9-24.6]                                             | 0.319            | 4.6 [3.1-6.1]                                                                           | 0.224        | 88.6 [86.5-90.9]     | 0.649            |
| female       | 362 | 74.9 [70.3-79.7]      |                  | 19.7 [15.2-23.9]                                             |                  | 2.8 [1.0-4.6]                                                                           |              | 87.5 [84.0-91.3]     |                  |
| ECOG-PS      |     |                       |                  |                                                              |                  |                                                                                         |              |                      |                  |
| Grade 0      | 958 | 76.8 [74.1-79.6]      | <b>&lt;0.001</b> | 19.0 [16.4-21.6]                                             | <b>&lt;0.001</b> | 3.4 [2.1-4.6]                                                                           | <b>0.013</b> | 90.8 [88.9-92.7]     | <b>&lt;0.001</b> |
| Grade 1+2    | 264 | 62.4 [56.5-68.8]      |                  | 29.1 [22.9-34.8]                                             |                  | 7.2 [3.6-10.7]                                                                          |              | 79.3 [74.3-84.8]     |                  |
| BMI          |     |                       |                  |                                                              |                  |                                                                                         |              |                      |                  |
| ≤25          | 425 | 73.5 [69.3-77.9]      | 0.877            | 22.1 [17.8-26.1]                                             | 0.694            | 4.6 [2.4-6.7]                                                                           | 0.651        | 89.6 [86.6-92.7]     | 0.612            |
| 25-30        | 538 | 74.0 [70.3-77.9]      |                  | 20.8 [17.1-24.3]                                             |                  | 3.8 [2.0-5.5]                                                                           |              | 89.1 [86.4-91.9]     |                  |
| >30          | 269 | 73.3 [68.0-79.0]      |                  | 20.4 [15.1-25.4]                                             |                  | 3.9 [1.4-6.4]                                                                           |              | 85.1 [80.8-89.8]     |                  |
| cT-category  |     |                       |                  |                                                              |                  |                                                                                         |              |                      |                  |



|                       | N    | 3-year DFS<br>% (95% CI) | P-Value           | 3-year cumulative<br>incidence of distant<br>metastases % (95% CI) | P-<br>Value       | 3-year<br>cumulative<br>incidence of<br>local recurrences<br>after local R0/R1<br>resection<br>% (95% CI) | P-Value | 3-year OS<br>% (95% CI) | P-Value           |
|-----------------------|------|--------------------------|-------------------|--------------------------------------------------------------------|-------------------|-----------------------------------------------------------------------------------------------------------|---------|-------------------------|-------------------|
| cT2                   | 54   | 77.7 [66.8-90.4]         | <b>&lt; 0.001</b> | 12.9 [2.6-22.2]                                                    | <b>&lt; 0.001</b> | 2.1 [0.0-6.2]                                                                                             | 0.179   | 87.7 [78.9-97.5]        | <b>0.009</b>      |
| cT3                   | 1086 | 74.8 [72.2-77.6]         |                   | 20.4 [17.8-22.9]                                                   |                   | 3.8 [2.6-5.0]                                                                                             |         | 89.1 [87.2-91.1]        |                   |
| cT4                   | 91   | 56.7 [47.2-68.2]         |                   | 34.8 [23.6-44.4]                                                   |                   | 8.8 [2.3-14.9]                                                                                            |         | 80.3 [72.3-89.2]        |                   |
| cN-category           |      |                          |                   |                                                                    |                   |                                                                                                           |         |                         |                   |
| cN0                   | 305  | 74.4 [69.5-79.7]         | 0.654             | 19.6 [14.7-24.2]                                                   | 0.779             | 3.0 [0.9-5.0]                                                                                             | 0.919   | 88.5 [84.8-92.4]        | 0.654             |
| cN1-2                 | 903  | 73.4 [70.5-76.4]         |                   | 21.7 [18.8-24.4]                                                   |                   | 4.4 [3.0-5.8]                                                                                             |         | 88.2 [86.0-90.4]        |                   |
| Grading               |      |                          |                   |                                                                    |                   |                                                                                                           |         |                         |                   |
| G1                    | 64   | 68.2 [56.9-81.7]         | <b>&lt; 0.001</b> | 21.8 [9.9-32.2]                                                    | <b>0.001</b>      | 3.7 [0.0-8.7]                                                                                             | 0.108   | 93.1 [86.7-99.9]        | <b>&lt; 0.001</b> |
| G2                    | 998  | 75.7 [73.0-78.5]         |                   | 19.4 [16.8-22.0]                                                   |                   | 3.6 [2.4-4.8]                                                                                             |         | 89.9 [88.0-91.9]        |                   |
| G3                    | 100  | 56.8 [47.6-67.8]         |                   | 35.9 [25.1-45.1]                                                   |                   | 9.7 [3.1-15.8]                                                                                            |         | 71.7 [62.8-81.8]        |                   |
| Distance from<br>anus |      |                          |                   |                                                                    |                   |                                                                                                           |         |                         |                   |
| 0-5 cm                | 402  | 70.1 [65.5-74.8]         | 0.056             | 25.3 [20.7-29.6]                                                   | <b>0.043</b>      | 3.9 [1.89-6.0]                                                                                            | 0.874   | 89.1 [86.0-92.4]        | 0.946             |
| 5-10 cm               | 608  | 75.2 [71.71-78.8]        |                   | 19.2 [15.9-22.5]                                                   |                   | 4.1 [2.43-5.8]                                                                                            |         | 87.9 [85.3-90.7]        |                   |
| >10 cm                | 114  | 73.7 [65.71-82.6]        |                   | 18.8 [10.7-26.2]                                                   |                   | 4.3 [0.06-8.3]                                                                                            |         | 88.6 [82.7-94.9]        |                   |

Abbreviations: DFS, disease-free survival; OS, overall survival; 5-FU, 5-fluorouracil; CRT, chemoradiotherapy; Ox, oxaliplatin; TME, total mesorectal excision; ECOG-PS, Eastern Cooperative Oncology Group performance status; BMI, body mass index;

Significant p-values are marked in bold

**eTable 4. Multivariate analysis of different covariables on 3-year outcomes after preoperative 5-FU chemoradiotherapy +/- oxaliplatin and surgery**

|                                        | DFS              |                  | Cumulative incidence of distant metastases |                  | Cumulative incidence of local recurrences after local R0/R1 resection |              | OS               |                  |
|----------------------------------------|------------------|------------------|--------------------------------------------|------------------|-----------------------------------------------------------------------|--------------|------------------|------------------|
|                                        | HR [95% CI]      | p-value          | HR [95% CI]                                | p-value          | HR [95% CI]                                                           | p-value      | HR [95% CI]      | p-value          |
| Pathologist-based TME                  |                  |                  |                                            |                  |                                                                       |              |                  |                  |
| mesorectal vs intramesorectal          | 1.13 [0.83-1.53] | 0.439            | 1.13 [0.80-1.60]                           | 0.484            | 1.35 [0.62-2.97]                                                      | 0.449        | 1.30 [0.87-1.94] | 0.206            |
| mesorectal vs muscularis propria       | 1.41 [0.90-2.20] | 0.135            | 1.40 [0.85-2.33]                           | 0.188            | 2.62 [1.11-6.18]                                                      | <b>0.028</b> | 1.26 [0.68-2.32] | 0.457            |
| ypN-category                           |                  |                  |                                            |                  |                                                                       |              |                  |                  |
| ypN+ vs ypN0                           | 2.09 [1.65-2.66] | <b>&lt;0.001</b> | 2.54 [1.94-3.33]                           | <b>&lt;0.001</b> | 2.22 [1.18-4.16]                                                      | <b>0.013</b> | 1.89 [1.35-2.62] | <b>&lt;0.001</b> |
| ypT-category                           |                  |                  |                                            |                  |                                                                       |              |                  |                  |
| ypT3 vs ypT0-2                         | 1.73 [1.32-2.27] | <b>&lt;0.001</b> | 1.96 [1.43-2.68]                           | <b>&lt;0.001</b> | 1.27 [0.60-2.67]                                                      | 0.530        | 1.74 [1.19-2.54] | <b>0.004</b>     |
| ypT4 vs ypT0-2                         | 2.54 [1.47-4.37] | <b>&lt;0.001</b> | 2.35 [1.24-4.48]                           | <b>0.009</b>     | 2.89 [0.93-9.02]                                                      | 0.067        | 3.51 [1.79-6.90] | <b>&lt;0.001</b> |
| Treatment arm                          |                  |                  |                                            |                  |                                                                       |              |                  |                  |
| 5-FU/Ox-CRT vs 5-FU CRT                | 0.79 [0.62-0.99] | <b>0.039</b>     | 0.79 [0.61-1.03]                           | 0.079            | 0.45 [0.24-0.86]                                                      | <b>0.015</b> | 0.88 [0.64-1.21] | 0.444            |
| Circumferential resection margin (CRM) |                  |                  |                                            |                  |                                                                       |              |                  |                  |
| >1mm vs ≤1 mm                          | 1.58 [1.08-2.31] | <b>0.017</b>     | 1.29 [0.83-1.99]                           | 0.256            | 3.60 [1.66-7.79]                                                      | <b>0.001</b> | 1.55 [0.94-2.56] | 0.083            |
| >1mm vs pCR                            | 0.41 [0.23-0.73] | <b>0.002</b>     | 0.36 [0.17-0.77]                           | <b>0.008</b>     | 0.24 [0.03-1.87]                                                      | 0.172        | 0.43 [0.19-0.97] | <b>0.041</b>     |

Abbreviations: DFS, disease-free survival; OS, overall survival; HR, hazard ratio; CI, confidence interval; 5-FU, 5-fluorouracil; Ox, oxaliplatin; TME, total mesorectal excision; CRT, chemoradiotherapy; pCR, pathologic complete response;

\*Patients with R2-resection were also included in the multivariate analysis for cumulative incidence of distant metastases and overall survival
